CORRECTION

# Correction: Risk factors and incidence of surgical wound infection after stoma reversal: A systematic review and meta-analysis

Siruo Li, Ziyi Zhou, Feixia Wang, Weizhen Li, Chaoxu Liu, Lu Li

There are errors in the author affiliations. The correct affiliations are as follows:

Siruo Li<sup>1</sup>, Ziyi Zhou<sup>1</sup>, Feixia Wang<sup>1</sup>, Weizhen Li<sup>1</sup>, Chaoxu Liu<sup>2</sup>, Lu Li<sup>1</sup>

1 Nursing department, The First Affiliated Hospital, Zhejiang University School of Medicine, Hangzhou City, Zhejiang Province, China, 2 Colorectal Surgery Department, The First Affiliated Hospital, Zhejiang University School of Medicine, Hangzhou City, Zhejiang Province, China

## Reference

1. Li S, Zhou Z, Wang F, Li W, Liu C, Li L. Risk factors and incidence of surgical wound infection after stoma reversal: A systematic review and meta-analysis. PLoS One. 2025;20(7):e0328344. <https://doi.org/10.1371/journal.pone.0328344> PMID: [40668781](https://pubmed.ncbi.nlm.nih.gov/40668781/)

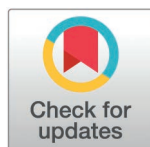

## OPEN ACCESS

**Citation:** Li S, Zhou Z, Wang F, Li W, Liu C, Li L (2025) Correction: Risk factors and incidence of surgical wound infection after stoma reversal: A systematic review and meta-analysis. PLoS One 20(11): e0336704. <https://doi.org/10.1371/journal.pone.0336704>

**Published:** November 11, 2025

**Copyright:** © 2025 Li et al. This is an open access article distributed under the terms of the [Creative Commons Attribution License](https://creativecommons.org/licenses/by/4.0/), which permits unrestricted use, distribution, and reproduction in any medium, provided the original author and source are credited.
